# Supplementary material for: Evaluating diverse electrode surface patterns of 3D printed carbon thermoplastic electrochemical sensors
Source: Royal Society of Chemistry journal article supplement (doi:10.1039/d3an01592k), 2024-01-01
Supplement: d3an01592k1.pdf [file d3an01592k1.pdf]

## Supporting Information

### Evaluating diverse electrode surface patterns of 3D printed carbon thermoplastic electrochemical sensors

Chloe Miller<sup>a, b</sup>, Oliver Keattch<sup>a</sup>, Ricoverer S. Shergill<sup>a, b</sup> and Bhavik Anil Patel<sup>a, b</sup>

<sup>a</sup> School of Applied Sciences, Brighton, BN2 4GJ, UK

<sup>b</sup> Centre for Lifelong Health, Brighton, BN2 4GJ, UK

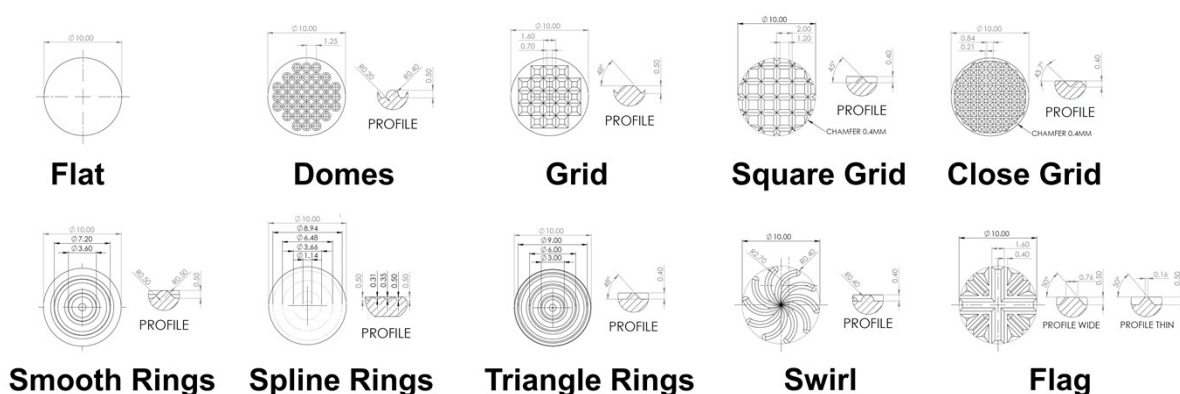

**Figure S1.** CAD schematics of the patterned surface electrodes to show that the geometric surface area is 10mm.

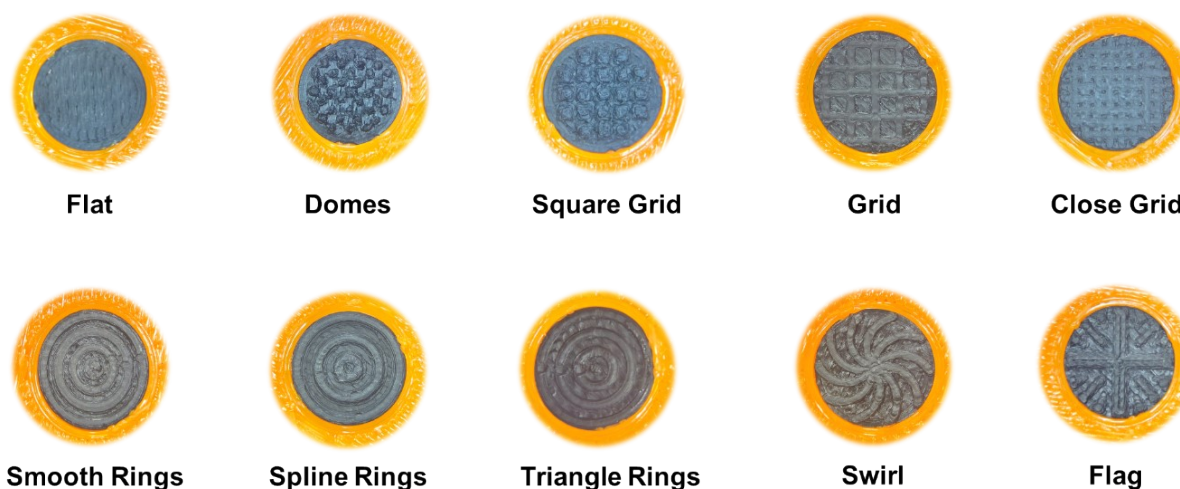

**Figure S2.** Light microscopy images of the patterned surfaces of the 3D printed CB/PLA electrodes before electrochemical pre-treatment.

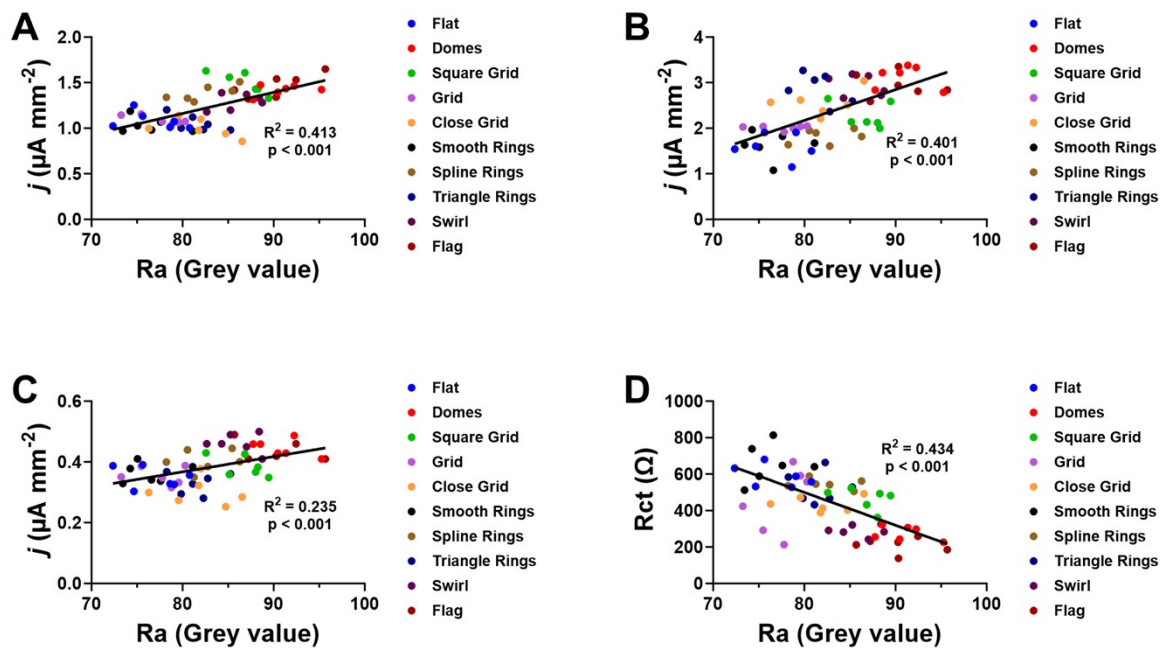

**Figure S3.** Correlations of electrode surface roughness with electrochemical behaviour of the different patterned electrodes. Current values from measurements conducted in (A) 1 mM FcMeOH in 1 M KCl, (B) 1 mM ferricyanide in 1 M KCl, (C) 1 mM dopamine in 0.1 M PBS buffer and (D) Rct values obtained from EIS measurements in 1 mM ferricyanide and 1 mM ferrocyanide mixture solution 1 M KCl.

### 1 mM FcMeOH in 1 M KCl

| vs             | Domes   | Square Grid | Grid    | Close Grid | Smooth Rings | Spline Rings | Triangle Rings | Swirl  | Flag |
|----------------|---------|-------------|---------|------------|--------------|--------------|----------------|--------|------|
| Domes          |         |             |         |            |              |              |                |        |      |
| Square Grid    |         |             |         |            |              |              |                |        |      |
| Grid           | p<0.001 | p<0.001     |         |            |              |              |                |        |      |
| Close Grid     | p<0.001 | p<0.001     |         |            |              |              |                |        |      |
| Smooth Rings   | p<0.001 | p<0.001     |         |            |              |              |                |        |      |
| Spline Rings   |         |             | p<0.001 | p<0.001    | p<0.001      |              |                |        |      |
| Triangle Rings | p<0.001 | p<0.001     |         |            |              | p<0.001      |                |        |      |
| Swirl          |         | P<0.01      | p<0.05  | p<0.001    | p<0.001      |              | p<0.01         |        |      |
| Flag           |         |             | p<0.001 | p<0.001    | p<0.001      |              | p<0.001        | p<0.05 |      |

### 1 mM FeCN in 1 M KCl

| vs             | Domes  | Square Grid | Grid | Close Grid | Smooth Rings | Spline Rings | Triangle Rings | Swirl | Flag |
|----------------|--------|-------------|------|------------|--------------|--------------|----------------|-------|------|
| Domes          |        |             |      |            |              |              |                |       |      |
| Square Grid    |        |             |      |            |              |              |                |       |      |
| Grid           |        |             |      |            |              |              |                |       |      |
| Close Grid     |        |             |      |            |              |              |                |       |      |
| Smooth Rings   |        | p<0.05      |      |            |              |              |                |       |      |
| Spline Rings   |        |             |      |            |              |              |                |       |      |
| Triangle Rings | P<0.05 | p<0.01      |      |            |              |              |                |       |      |
| Swirl          |        |             |      |            | p<0.01       |              | p<0.01         |       |      |
| Flag           |        |             |      |            |              |              |                |       |      |

### 1 mM Dopamine in 0.1 M PBS buffer

| vs             | Domes   | Square Grid | Grid    | Close Grid | Smooth Rings | Spline Rings | Triangle Rings | Swirl | Flag |
|----------------|---------|-------------|---------|------------|--------------|--------------|----------------|-------|------|
| Domes          |         |             |         |            |              |              |                |       |      |
| Square Grid    | p<0.001 |             |         |            |              |              |                |       |      |
| Grid           | p<0.001 |             |         |            |              |              |                |       |      |
| Close Grid     | p<0.05  |             | p<0.05  |            |              |              |                |       |      |
| Smooth Rings   | p<0.001 | p<0.01      |         | p<0.001    |              |              |                |       |      |
| Spline Rings   | p<0.001 |             |         | p<0.001    |              |              |                |       |      |
| Triangle Rings |         | p<0.01      | p<0.001 |            | p<0.001      | p<0.001      |                |       |      |
| Swirl          |         | p<0.01      | p<0.001 |            | p<0.001      | p<0.001      |                |       |      |
| Flag           |         | p<0.01      | p<0.001 |            | p<0.001      | p<0.001      |                |       |      |

**Figure S4.** Tables to show the statistical analysis of the patterned surfaces against the others. Two different inner and outer sphere redox probes were used alongside Dopamine to determine if there were any significant differences between the patterned surfaces to aid in the decision of which electrode had the overall better performance.

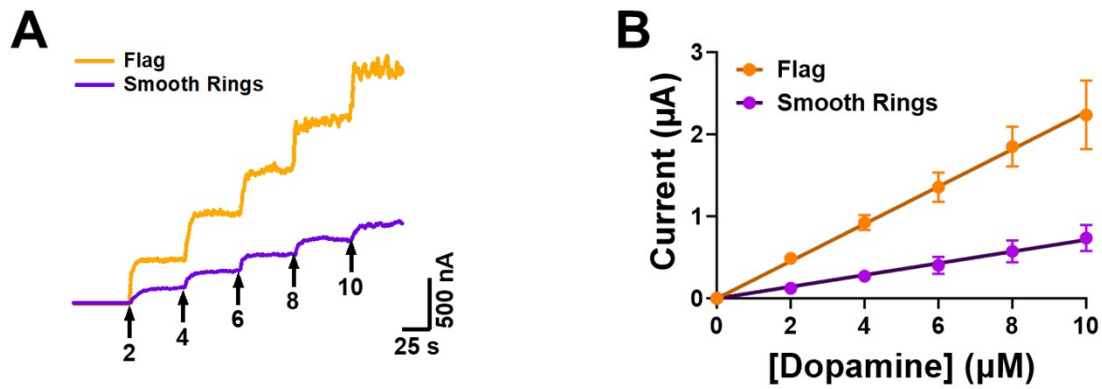

**Figure S5.** Calibration of dopamine for smooth ring and flag patterned electrodes. (A) Individual Amperometric traces showing the change in the current following the addition of dopamine every 50 seconds. Values are shown in  $\mu\text{M}$  with the voltage being held at 0.65 V. (B) Calibration response of flag and smooth ring patterned electrodes. Data is shown as mean  $\pm$  SD,  $n = 5$ .

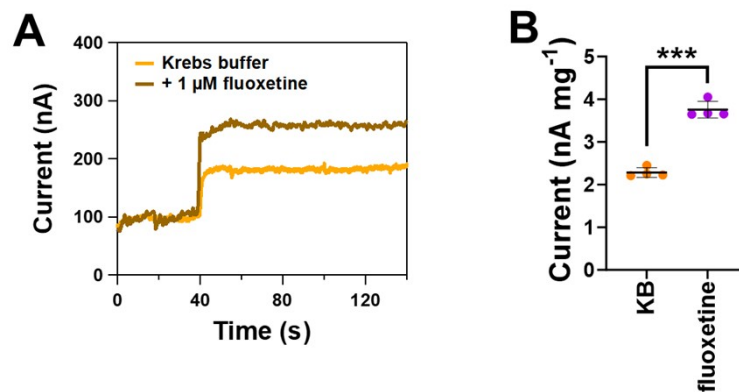

**Figure S6:** Effect of fluoxetine on colonic tissue measured on the flag patterned CB/PLA electrode. (A) amperometric traces showing the overflow of serotonin from supernatants obtained from colonic tissue incubated in Krebs buffer with and without 1  $\mu\text{M}$  fluoxetine. (B) Differences in the current response in the presence of fluoxetine. Data is shown as mean  $\pm$  SD,  $n = 4$ , \*\*\* $p < 0.001$ .

**Table S1.** Table showing the active surface area of the patterned surfaces used to determine the Current Density from the CAD images.

|                | Area (mm <sup>2</sup> ) |
|----------------|-------------------------|
| Flat           | 78.54                   |
| Domes          | 99.71                   |
| Square Draft   | 100.04                  |
| Grid           | 99.61                   |
| Close Grid     | 100.08                  |
| Smooth Rings   | 100.22                  |
| Spline Rings   | 100.02                  |
| Triangle Rings | 99.76                   |
| Swirl          | 100.13                  |
| Flag           | 99.9                    |
